# Supplementary material for: Artificial Autopolyploidization Modifies the Tricarboxylic Acid Cycle and GABA Shunt in Arabidopsis thaliana Col-0
Source: PubMed Central journal article supplement (PMC4876396; doi:10.1038/srep26515), 2016-05-23
Supplement: srep26515-s1.pdf [file srep26515-s1.pdf]

Supplementary information for the manuscript:

**Artificial Autopolyploidization Modifies the Tricarboxylic Acid Cycle and GABA Shunt in *Arabidopsis thaliana* Col-0**

Fredd Vergara<sup>1\*</sup>, Jun Kikuchi<sup>1,3,4</sup>, Christian Breuer<sup>2</sup>

<sup>1</sup>Environmental Metabolic Analysis Research Team, CSRS, RIKEN. 1-7-22 Suehiro-cho, Tsurumi-ku, Kanagawa-ken, 230-0045, Japan; <sup>2</sup>Cell Function Research Team, CSRS, RIKEN; <sup>3</sup>Graduate School of Medical Life Science, Yokohama City University; <sup>4</sup>Graduate School of Bioagricultural Sciences, Nagoya University

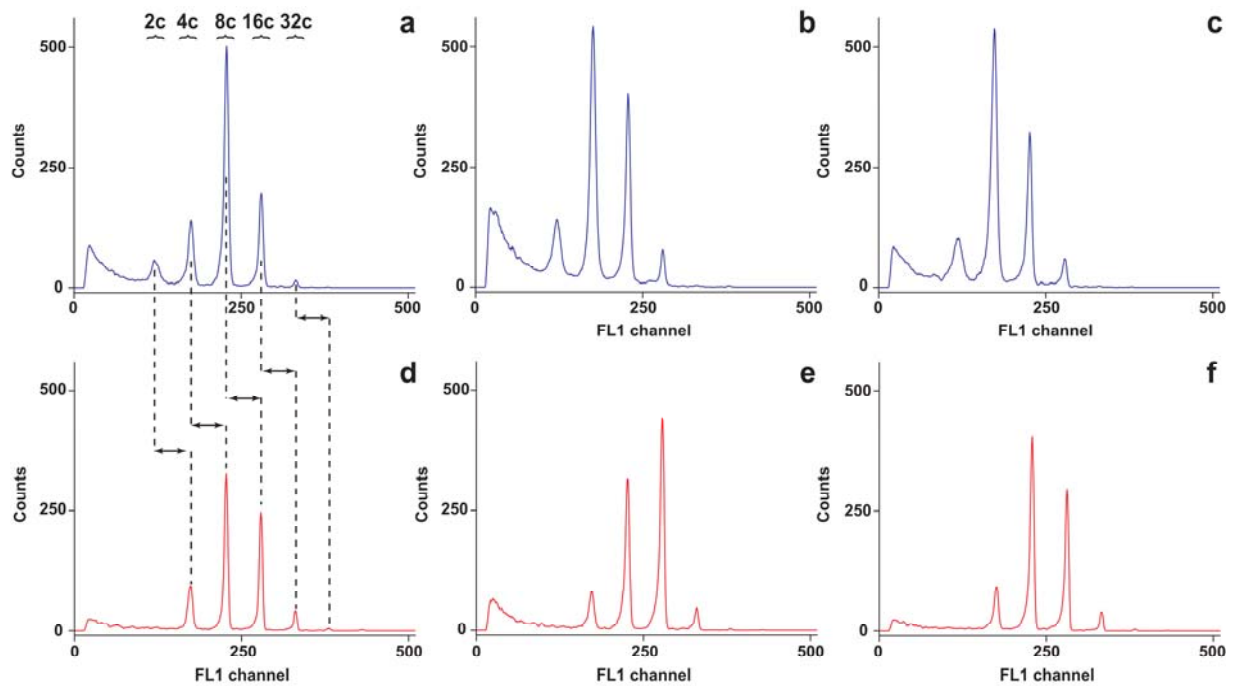

**Figure S1.** Ploidy level determination. Flow cytometry profiles of three randomly chosen diploid (a-c, blue) and autotetraploid (d-f, red) *Arabidopsis thaliana* col-0. Autotetraploidy is clearly observed as a shift in the location of the peaks between the upper and lower graphs across the FL1-axis (2c to 4c, 4c to 8c and so forth), which represents DNA content as a function of fluorescence.

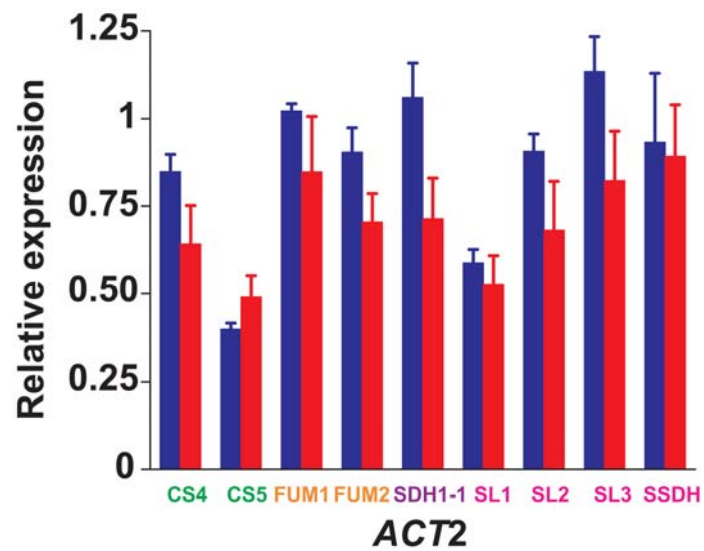

**Figure S2.** Relative gene expression in *Arabidopsis thaliana* Col-0 above-ground tissue. Graph shows quantitative real-time gene expression of enzymes and participating in the tricarboxylic acid cycle (TCA) and carbon:nitrogen balance. Diploids: blue bars, autotetraploids: red bars. Bars represent means and standard deviations of 8 plants (qRT-PCR) or 30 plants ( $^1\text{H}$  NMR). Actin 2 expression level was used for normalizing qRT-PCR values. Names of genes are colored as their corresponding metabolites (Fig. 5 in main text).

| Primer name | Primer sequence (5'–3') | Amplicon region            |
|-------------|-------------------------|----------------------------|
| CS4F        | AACCTGATTGCTCGTGTTCC    | Citrate synthase           |
| CS4R        | GCCTCATGAGCTCTTTCACC    | Citrate synthase           |
| CS5F        | AACAGTGGCAAGGTTGTTCC    | Citrate synthase           |
| CS5R        | CCACGGGTTCTTGACCTTT     | Citrate synthase           |
| FUM1F       | GGTTTGTGCACAGGTTATGG    | Fumarase                   |
| FUM1R       | TTTTTCTCGAACGAAGCTGAA   | Fumarase                   |
| FUM2F       | GCAAGCGCTCTCTTACATTC    | Fumarase                   |
| FUM2R       | TGAGCTCTTTTGGCTACTGCT   | Fumarase                   |
| SDH1-1F     | GGTGTAGGACCGCATAAGGA    | Succinate<br>dehydrogenase |
| SDH1-1R     | GAACCGTGGGTAAGACAGGA    | Succinate<br>dehydrogenase |
| SDH1-2F     | TATTCGCTGGTGTTCGATGTT   | Succinate<br>dehydrogenase |
| SDH1-2R     | TCTCCTGCAGCCATTAGTCC    | Succinate<br>dehydrogenase |
| SL1F        | TCAAACCTGGTGAATGCAAG    | Succinate CoA<br>ligase    |
| SL1R        | ATTAACGGATCCCCACCA      | Succinate CoA<br>ligase    |
| SL2F        | AACGTGATGAGGCTGAAGAGA   | Succinate CoA<br>ligase    |
| SL2R        | CGGTCCAGAATAATGGAAAAG   | Succinate CoA<br>ligase    |
| SL3F        | GCAGGAGTGACACCGAAGA     | Succinate CoA<br>ligase    |
| SL3R        | CTCAGCCTCAATACCCTCCA    | Succinate CoA<br>ligase    |
| SSDHF       | TAGCTCCCCTTATTCGGTTC    | Succinic                   |

---

|        |                              |                                           |
|--------|------------------------------|-------------------------------------------|
|        |                              | semialdehyde<br>dehydrogenase             |
| SSDHR  | CGTTCACCCCTACAAGTCCA         | Succinic<br>semialdehyde<br>dehydrogenase |
| ACT2F  | CTGGATCGGTGGTTCCATTC         | Actin 2                                   |
| ACT2R  | CCTGGACCTGCCTCATCATAC        | Actin 2                                   |
| UBQ10F | GGCCTTGTATAATCCCTGATGAATAAG  | Ubiquitin 10                              |
| UBQ10R | AAAGAGATAACAGGAACGGAAACATAGT | Ubiquitin 10                              |

---

**Table S1.** Primers used for qRT-PCR.
